# Supplementary material for: Fear response-based prediction for stress susceptibility to PTSD-like phenotypes
Source: PubMed Central journal article supplement (PMC7539418; doi:10.1186/s13041-020-00667-5), 2020-10-07
Supplement: 13041_2020_667_MOESM1_ESM.pdf [file 13041_2020_667_MOESM1_ESM.pdf]

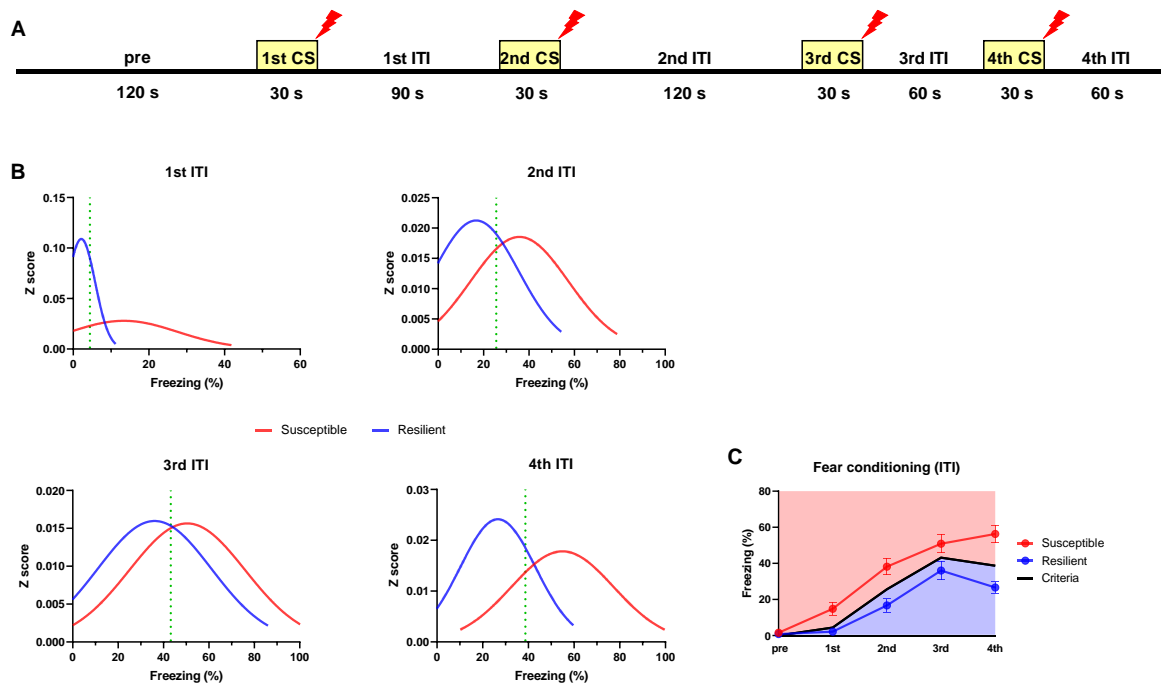

1

2 **Supplemental Fig. 1** ITI freezing as a criterion for prediction of stress susceptibility.

3 (A) A behavioral timeline. After an initial 120 s acclimation period, mice were subjected to 4  
 4 trials of tone CS. CS were co-terminated with a foot shock. Each CS lasted for 30 s, and was  
 5 presented in pseudorandom order with a 90 s ITI (range 60-120 s).

6 (B) Distributions of ITI freezing data from susceptible (red) and resilient (blue) mice.  
 7 Distributions of freezing data during the 1st ITI (top left): resilient,  $\mu = 2.1403$ ,  $\sigma = 3.587$ ;  
 8 susceptible,  $\mu = 13.3774$ ,  $\sigma = 16.6243$ ; green, 4.4324 where normalized  $Z_1 = Z_2$ . Distributions  
 9 of freezing data during the 2nd ITI (top right): resilient,  $\mu = 16.7149$ ,  $\sigma = 18.3964$ ; susceptible,  
 10  $\mu = 35.7977$ ,  $\sigma = 21.6703$ ; green, 25.606, where normalized  $Z_1 = Z_2$ . Distributions of freezing  
 11 data during the 3th ITI (bottom left): resilient,  $\mu = 36.0558$ ,  $\sigma = 24.4761$ ; susceptible,  $\mu =$   
 12  $50.4523$ ,  $\sigma = 24.1190$ ; green, 43.1805, where normalized  $Z_1 = Z_2$ . Distributions of freezing data  
 13 during the 4th ITI (bottom right): resilient,  $\mu = 26.6585$ ,  $\sigma = 16.1910$ ; susceptible,  $\mu = 54.9368$ ,  
 14  $\sigma = 22.3665$ ; green, 38.6686, where normalized  $Z_1 = Z_2$ .

15 (C) Criterion for categorization of mice into susceptible and resilient groups. Black line is the

16 criterion that connects the green points in panels B.

17 Plots show means  $\pm$  SEMs.

18

19
