# Supplementary material for: Fear response-based prediction for stress susceptibility to PTSD-like phenotypes
Source: PubMed Central journal article supplement (PMC7539418; doi:10.1186/s13041-020-00667-5), 2020-10-07
Supplement: 13041_2020_667_MOESM2_ESM.pdf [file 13041_2020_667_MOESM2_ESM.pdf]

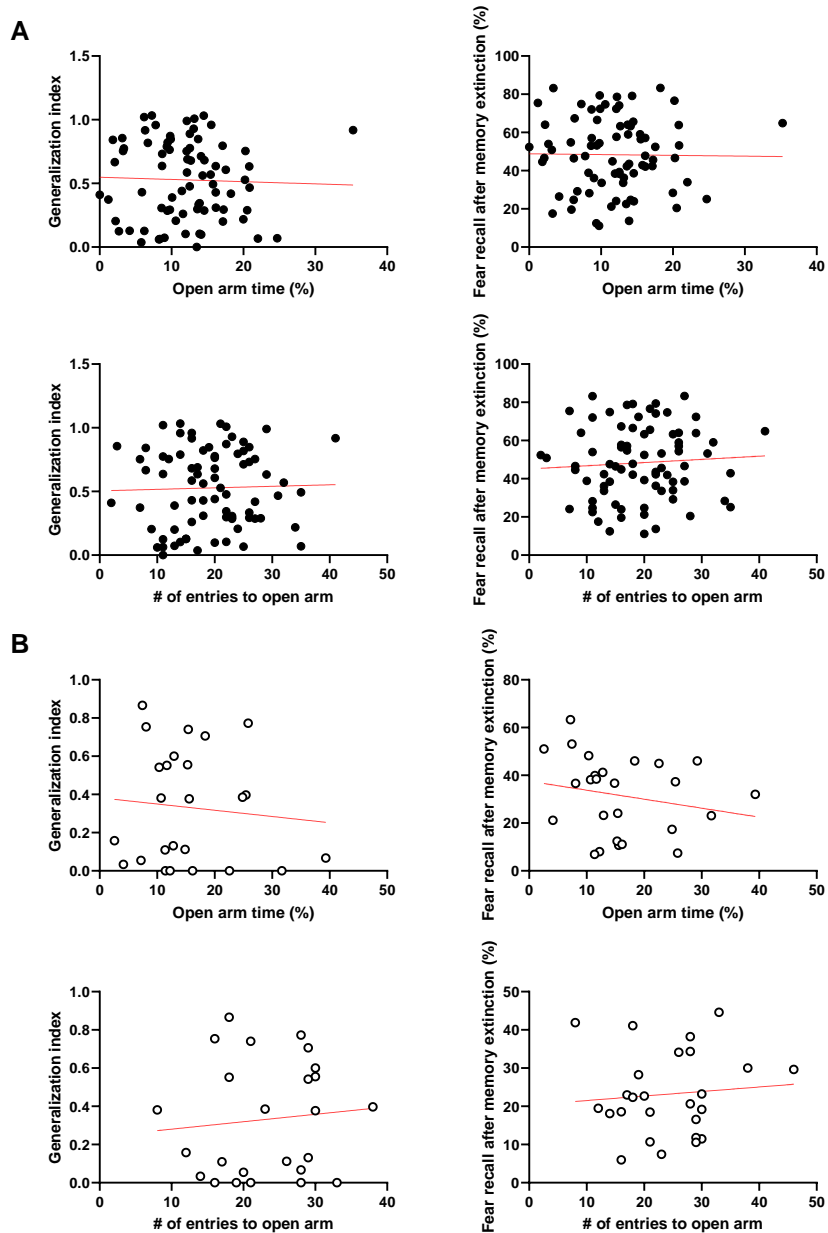

1

2 **Supplemental Fig. 2** Anxious behaviors do not correlate with occurrence of PTSD-like  
 3 phenotypes.

4 (A) Anxiety levels of stressed mice do not correlate with PTSD-like behaviors. Neither the  
 5 amount of time that stressed mice spent in the open arms of the EPM (top left, Pearson  
 6 correlations,  $R = -0.03426$ ) nor the number of entries that stressed mice made into open arms  
 7 (bottom left,  $R = -0.01298$ ) correlated with the fear generalization indices. Neither the amount

8 of time that stressed mice spent in the open arms of the EPM (top right,  $R = -0.01298$ ) nor the  
9 number of entries that stressed mice made into open arms (bottom right,  $R = 0.06744$ )  
10 correlated with freezing responses 24 h after memory extinction.

11 **(B)** Anxiety levels of unstressed control mice do not correlate with PTSD-like behaviors.  
12 Neither the amount of time that control mice spent in the open arms of the EPM (top left,  $R =$   
13  $-0.09436$ ) nor the number of entries that control mice made into open arms (bottom left,  $R =$   
14  $0.09593$ ) correlated with the fear generalization indices. Neither the amount of time that control  
15 mice spent in the open arms of the EPM (top right,  $R = -0.2067$ ) nor the number of entries that  
16 stressed mice made into open arms (bottom right,  $R = 0.09174$ ) correlated with freezing  
17 responses 24 h after memory extinction.
